# Supplementary material for: High-entropy alloy nanoparticles functionalized with reduced graphene oxide as a high-performance cathode for lithium–oxygen batteries
Source: Royal Society of Chemistry journal article supplement (doi:10.1039/d5nr00300h), 2025-01-01
Supplement: d5nr00300h1.pdf [file d5nr00300h1.pdf]

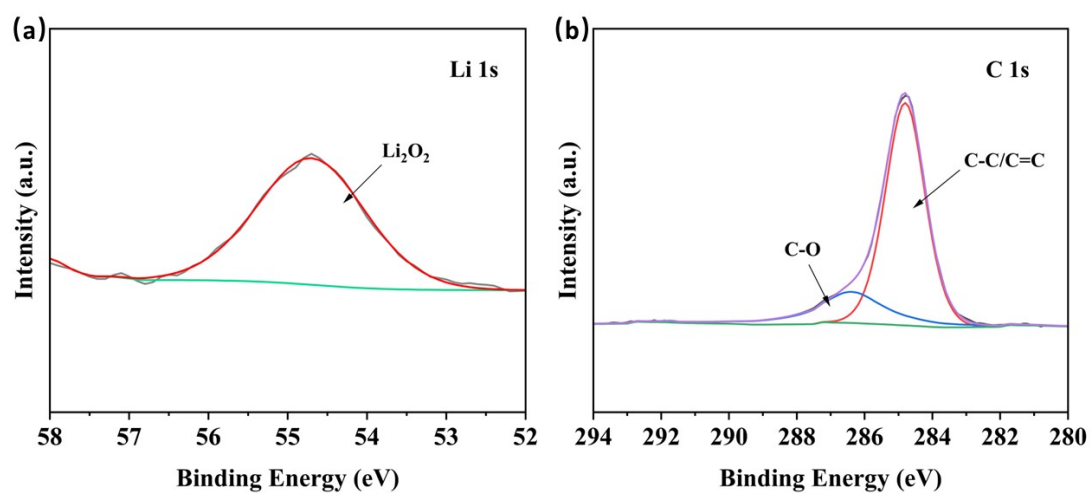

Figure S1 The Li 1s and C 1s spectrum of the discharged PtFeCoNiCu@rGO cathode with a specific capacity of 2000 mAh g<sup>-1</sup>
